# Supplementary material
Source: Elsevier journal article supplement (https://www.sciencedirect.com/science/article/pii/S0300893215003577)
Supplement: mmc1 [file mmc1.pdf]

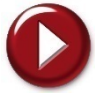**Material suplementario**

---

**Variabilidad interhospitalaria en la prescripción tras un síndrome coronario agudo: hallazgos del estudio ACDC**

Ignacio Ferreira-González <sup>a,\*</sup>, Xavier Carrillo <sup>b</sup>, Victoria Martín <sup>c</sup>, José M. de la Torre Hernández <sup>d</sup>, José Antonio Baz <sup>e</sup>, Josep Navarro Manchón <sup>f</sup>, Mónica Masotti <sup>g</sup>, Ángel Cequier <sup>h</sup>, Mérida Cárdenas <sup>i</sup> y Fernando Alfonso Manterola <sup>j</sup>,  
en representación de los investigadores del estudio ACDC<sup>◇</sup>

<sup>a</sup>*Unidad de Epidemiología, Servicio Cardiología, Hospital Universitari Vall d'Hebrón, CIBER de Epidemiología y Salud Pública (CIBERESP), Barcelona, España*

<sup>b</sup>*Servicio de Cardiología, Hospital Universitari Germans Trias i Pujol, Badalona, Barcelona, España*

<sup>c</sup>*Servicio de Cardiología, Hospital de la Santa Creu i Sant Pau, Barcelona, España*

<sup>d</sup>*Servicio de Cardiología, Hospital Universitario Marqués de Valdecilla, Santander, España*

<sup>e</sup>*Servicio de Cardiología, Hospital Meixoeiro, Vigo, Pontevedra, España*

<sup>f</sup>*Servicio de Cardiología, Hospital Universitari i Politècnic La Fe, Valencia, España*

<sup>g</sup>*Servicio de Cardiología, Hospital Clínic, Barcelona, España*

<sup>h</sup>*Servicio de Cardiología, Hospital Universitari de Bellvitge, L'Hospitalet de Llobregat, Barcelona, España*

<sup>i</sup>*Servicio de Cardiología, Hospital Universitari Dr. Josep Trueta, Girona, España*

<sup>j</sup>*Servicio de Cardiología, Hospital Clínico San Carlos, Madrid, España*

---

**Tabla.** Asociación bivariada: muerte o infarto o ictus a los 2 años de seguimiento

|                                                          | HR   | IC95%      | p       |
|----------------------------------------------------------|------|------------|---------|
| <b>Factores demográficos y de riesgo cardiovascular</b>  |      |            |         |
| Edad                                                     | 1,05 | 1,03-1,07  | < 0,001 |
| Mujeres                                                  | 1,59 | 1,06-2,38  | 0,025   |
| Fumador activo                                           | 0,65 | 0,42-1,03  | 0,064   |
| Hipercolesterolemia                                      | 1,35 | 0,92-1,97  | 0,125   |
| Hipertensión                                             | 1,68 | 1,11-2,55  | 0,015   |
| Diabetes                                                 | 1,65 | 1,14-2,39  | 0,008   |
| <b>Antecedentes cardiovasculares</b>                     |      |            |         |
| Enfermedad arterial periférica                           | 2,88 | 1,9-4,38   | < 0,001 |
| Ictus                                                    | 2,27 | 1,22-4,2   | 0,010   |
| Insuficiencia cardíaca                                   | 2,85 | 1,6-5,07   | < 0,001 |
| Marcapasos                                               | 3,12 | 0,99-9,83  | 0,052   |
| Prótesis valvular                                        | 2,46 | 0,34-17,6  | 0,37    |
| Fibrilación auricular                                    | 3,62 | 2,03-6,45  | < 0,001 |
| Infarto agudo de miocardio                               | 1,74 | 1,19-2,56  | 0,005   |
| Revascularización coronaria quirúrgica                   | 1,53 | 1,03-2,28  | 0,037   |
| Revascularización percutánea                             | 1,54 | 0,78-3,04  | 0,215   |
| <b>Otras condiciones</b>                                 |      |            |         |
| Enfermedad pulmonar obstructiva crónica                  | 3,26 | 2,13-5)    | 0,000   |
| Insuficiencia renal crónica                              | 5,63 | 3,65-8,69) | 0,000   |
| Enfermedad hepática crónica                              | 3,03 | 1,12-8,23) | 0,029   |
| Enfermedad oncológica                                    | 1,96 | 0,72-5,31) | 0,186   |
| Tratamiento anticoagulante crónico                       | 3,74 | 2,05-6,8)  | 0,000   |
| <b>Características psicosociales</b>                     |      |            |         |
| Inmigrante                                               | 1,63 | 0,72-3,71  | 0,245   |
| <i>Situación profesional (referencia: activo)</i>        |      |            | < 0001  |
| Pensionista                                              | 3,04 | 1,82-5,07  | < 0,001 |
| Sin empleo                                               | 3,36 | 1,25-9,05  | 0,017   |
| Otras situaciones                                        | 2,04 | 0,94-4,43  | 0,070   |
| <i>Nivel educativo (referencia: bajo)</i>                |      |            | 0,008   |
| Medio                                                    | 0,60 | 0,41-0,89  | 0,011   |
| Alto                                                     | 0,39 | 0,18-0,83  | 0,014   |
| <i>Índice de depresión Escala PHQ</i>                    | 1,51 | 0,92-2,47) | 0,105   |
| <b>Hallazgos durante el ingreso</b>                      |      |            |         |
| Insuficiencia cardíaca                                   | 3,32 | 2,13-5,18  | 0,000   |
| Hemorragia mayor                                         | 4,35 | 1,07-17,61 | 0,039   |
| Fracción de eyección < 45%                               | 1,80 | 1,14-2,84  | 0,012   |
| Paciente incluido en ensayo clínico                      | 0,49 | 0,25-0,97  | 0,040   |
| <b>Variables de hospital</b>                             |      |            |         |
| Hospital universitario                                   | 1,52 | 0,8-2,91   | 0,205   |
| Financiación privada                                     | 0,85 | 0,43-1,68  | 0,646   |
| Pacientes revascularizados año 2007 (ref. < 500 por año) |      |            | 0,036   |
| 500-1000                                                 | 1,89 | 1,16-3,08  | 0,011   |
| > 1000                                                   | 1,66 | 0,99-2,8   | 0,057   |

HR: hazard ratio; IC95%: intervalo de confianza del 95%.
